# Supplementary material for: Interaction of nanodiamonds with bacteria
Source: Royal Society of Chemistry journal article supplement (doi:10.1039/c8nr05183f), 2018-01-01
Supplement: c8nr05183f1.pdf [file c8nr05183f1.pdf]

## Supplementary Material

### Interaction of nanodiamonds with bacteria

S.Y. Ong<sup>a</sup>, R.J.J. van Harmelen<sup>a</sup>, N. Norouzi<sup>b</sup>, F. Offens<sup>a</sup>, I.M. Venema<sup>a</sup>, M.B. Habibi Najafi<sup>b</sup>  
and R. Schirhagl<sup>a</sup>

<sup>a</sup> *University Medical Center Groningen Antonius Deusinglaan 1, 9713 AV Gronigen, The Netherlands*

<sup>b</sup> *Ferdowsi University Of Mashhad, Department of Food Science and Technology P.O. Box 91775-1163, Mashhad, Iran*

### Dynamic light scattering

Dynamic light scattering (DLS), a technique often referred to as photon correlation spectroscopy (PCS), is a common technique for determining particle size in colloidal suspensions. In this study, DLS measurements were performed using a Malvern ZetaSizer Nano system (Malvern Instruments Ltd., Malvern, UK, [www.malvern.com](http://www.malvern.com)) to determine the hydrodynamic diameter of the particles. The ZetaSizer measures the size of suspended colloidal particles by determining their Brownian motion using DLS. We prepared the samples by dispersing the FNDs (125 nm, 75 nm, 25 nm and 18 nm) at the concentration of 100 µg/mL in DI water, then analyzed by DLS at room temperature. Figure S1. shows size distribution by intensity of these measurements.

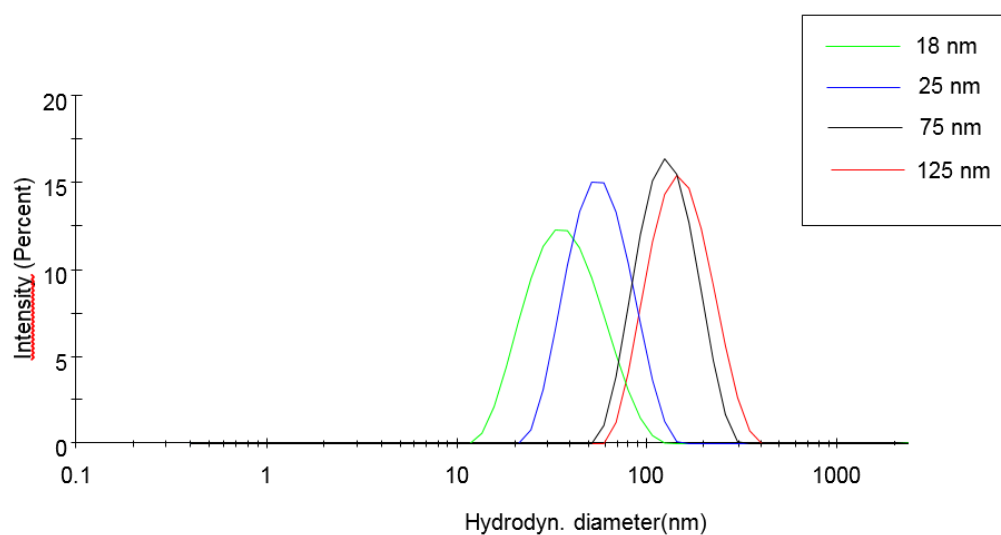

**Figure S1.** DLS size distribution curves of FNDs prepared in DI water
